# Supplementary material for: Changes in SARS-CoV-2 seroprevalence and population immunity in Finland, 2020–2022
Source: bioRxiv or medRxiv preprint supplement (doi:10.1101/2023.02.17.23286042), 2023-02-23
Supplement: Supplementary file [file media-1.pdf]

## 1. Supplementary information

### 1.1 FMIA assay specifications and thresholds for positivity

Assay specificity and sensitivity were determined by analysing sera (n=402) collected in mid-2019 (negative controls) and sera collected in 2020 from subjects (n=87) with PCR-confirmed COVID-19 14-51 days after symptom onset and no COVID-19 vaccination history (positive controls). The positive control sample material has been previously described<sup>1</sup>. Samples collected from April to September 2020 (n=3954) were only analysed for N-IgG, and the samples thereafter were analysed for N-IgG and S-IgG (n=5840).

Samples collected from April 2020 to December 2021 (n=7039) were analysed as duplicates diluted 1:100. The threshold for N-IgG positivity during this period was >6.7 BAU/ml resulting in 100% specificity and 95.8% sensitivity. Samples with >0.9 BAU/ml IgG to receptor binding domain and >1.6 BAU/ml IgG to full-length spike glycoprotein were considered S-IgG positive and the assay specificity and sensitivity were 100%.

Samples collected in 2022 (n=2755) were analysed as duplicates diluted 1:100 and 1:1600. The threshold for N-IgG positivity during this period was >7 BAU/ml resulting in 92.8% specificity and 100% sensitivity. Samples with >3 BAU/ml IgG to receptor binding domain and >2 BAU/ml IgG to full-length spike glycoprotein were considered S-IgG positive, and the assay specificity and sensitivity were 100%.

### 1.2 Supplementary references

1. Dub, T. *et al.* High secondary attack rate and persistence of SARS-CoV-2 antibodies in household transmission study participants, Finland 2020-2021. *Front. Med.* **9**, 876532 (2022).

## 1.3 Tables

Table S1. Description of the random population surveys

| Survey | Week/year | Sample size total/per district | Invited subjects | Participated subjects | Participation rate | Healthcare district |
|--------|-----------|--------------------------------|------------------|-----------------------|--------------------|---------------------|
| 1      | 14/2020   | 750                            | 733              | 468                   | 64%                | HUS                 |
| 2      | 15/2020   | 750                            | 728              | 451                   | 62%                | HUS                 |
| 3      | 16/2020   | 1000/200                       | 989              | 509                   | 51%                | All five            |
| 4      | 17/2020   | 1000/200                       | 980              | 469                   | 48%                | All five            |
| 5      | 17/2020   | 1000/200                       | 980              | 480                   | 49%                | All five            |
| 6      | 18/2020   | 750/150                        | 738              | 313                   | 42%                | All five            |
| 7      | 19/2020   | 400/80                         | 392              | 162                   | 41%                | All five            |
| 8      | 21/2020   | 400/80                         | 394              | 145                   | 37%                | All five            |
| 9      | 22/2020   | 400/80                         | 398              | 171                   | 43%                | All five            |
| 10     | 22/2020   | 900/500 <sup>§</sup> /80       | 876              | 314                   | 36%                | All five            |
| 11     | 25/2020   | 400/80                         | 391              | 132                   | 34%                | All five            |
| 12     | 29/2020   | 400/80                         | 391              | 130                   | 33%                | All five            |
| 13     | 31/2020   | 400/80                         | 396              | 138                   | 35%                | All five            |
| 14     | 33/2020   | 400*                           | 392              | 113                   | 29%                | All five            |
| 15     | 35/2020   | 400*                           | 390              | 113                   | 29%                | All five            |
| 16     | 37/2020   | 400*                           | 392              | 112                   | 29%                | All five            |
| 17     | 39/2020   | 400*                           | 387              | 113                   | 29%                | All five            |
| 18     | 41/2020   | 400*                           | 392              | 107                   | 27%                | All five            |
| 19     | 43/2020   | 400*                           | 392              | 104                   | 27%                | All five            |
| 20     | 45/2020   | 600* <sup>#</sup>              | 599              | 174                   | 29%                | All five            |
| 21     | 47/2020   | 600* <sup>#</sup>              | 600              | 170                   | 28%                | All five            |
| 22     | 49/2020   | 600* <sup>#</sup>              | 601              | 171                   | 28%                | All five            |
| 23     | 52/2020   | 600* <sup>#</sup>              | 594              | 164                   | 28%                | All five            |
| 24     | 02/2021   | 600* <sup>#</sup>              | 595              | 160                   | 27%                | All five            |
| 25     | 05/2021   | 600* <sup>#</sup>              | 597              | 192                   | 32%                | All five            |
| 26     | 07/2021   | 600* <sup>#</sup>              | 588              | 178                   | 30%                | All five            |
| 27     | 09/2021   | 600* <sup>#</sup>              | 594              | 184                   | 31%                | All five            |
| 28     | 11/2021   | 400                            | 382              | 111                   | 29%                | HUS                 |
| 29     | 14/2021   | 600* <sup>#</sup>              | 599              | 181                   | 30%                | All five            |
| 30     | 15/2021   | 400                            | 391              | 119                   | 30%                | HUS                 |
| 31     | 17/2021   | 600* <sup>#</sup>              | 601              | 147                   | 24%                | All five            |
| 32     | 19/2021   | 400                            | 390              | 101                   | 26%                | HUS                 |
| 33     | 21/2021   | 600* <sup>#</sup>              | 603              | 123                   | 20%                | All five            |
| 34     | 23/2021   | 400                            | 385              | 83                    | 22%                | HUS                 |
| 35     | 27/2021   | 400                            | 386              | 86                    | 22%                | HUS                 |
| 36     | 41/2021   | 750                            | 728              | 153                   | 21%                | HUS                 |
| 37     | 10/2022   | 2500                           | 2426             | 377                   | 16%                | HUS                 |
| 38     | 17/2022   | 2500                           | 2424             | 458                   | 19%                | HUS                 |
| 39     | 19/2022   | 4000/1000                      | 3929             | 731                   | 19%                | All excl. HUS       |
| 40     | 40/2022   | 6500/2500 <sup>§</sup> /1000   | 6358             | 1190                  | 19%                | All five            |

HUS= Helsinki and Uusimaa healthcare district

\*sample size per district adjusted by population

# sample size for HUS district doubled

§ sample size for HUS district

Table S2. The number of participants per year and month.

|    |           | 2020 | 2021 | 2022 |
|----|-----------|------|------|------|
| Q1 | January   | 0    | 53   | 1    |
|    | February  | 0    | 413  | 0    |
|    | March     | 0    | 418  | 168  |
| Q2 | April     | 1460 | 314  | 87   |
|    | May       | 1305 | 319  | 456  |
|    | June      | 685  | 215  | 791  |
| Q3 | July      | 201  | 43   | 38   |
|    | August    | 244  | 83   | 14   |
|    | September | 242  | 3    | 8    |
| Q4 | October   | 245  | 13   | 258  |
|    | November  | 261  | 132  | 879  |
|    | December  | 382  | 10   | 53   |

Table S3. Study population compared to Uusimaa region and Finland's 18-85-year-old population structure at the end of 2021.

|                                        |                       | Study population<br>n=9794 | Uusimaa, Finland,<br>18-85-year-olds<br>(n=1.35 million) | Whole Finland,<br>18-85-year-olds<br>(n=4.36 million) |
|----------------------------------------|-----------------------|----------------------------|----------------------------------------------------------|-------------------------------------------------------|
| Age                                    | 18-29                 | 11%                        | 19%                                                      | 18 %                                                  |
|                                        | 30-44                 | 25%                        | 29%                                                      | 25 %                                                  |
|                                        | 45-64                 | 44%                        | 32%                                                      | 32 %                                                  |
|                                        | 65-85                 | 19% <sup>a</sup>           | 21%                                                      | 26 %                                                  |
| Sex                                    | Female                | 61%                        | 51%                                                      | 50 %                                                  |
|                                        | Male                  | 39%                        | 49%                                                      | 50 %                                                  |
| Native language                        | Finnish or<br>Swedish | 97%                        | 85%                                                      | 91 %                                                  |
|                                        | Other                 | 3%                         | 15%                                                      | 9 %                                                   |
|                                        | Reside in Uusimaa     | 54%                        | 100%                                                     | 31%                                                   |
| Vaccinated for COVID-19 <sup>b</sup>   |                       | 96% <sup>d</sup>           | 88%                                                      | 88%                                                   |
| Registered COVID-19 cases <sup>c</sup> |                       | 2518 (26%) <sup>e</sup>    | 457 528 (34%)                                            | 1 219 008 (28%)                                       |

<sup>a</sup> 65-70-year-olds in 2021-2021 and 65-85-year-olds in 2022.

<sup>b</sup> Have received at least one COVID-19 vaccine dose before 15<sup>th</sup> of December 2021, i.e. would have developed vaccine-mediated immunity by 2022.

<sup>c</sup> January 1<sup>st</sup> 2020 to December 31<sup>st</sup> 2022.

<sup>d</sup> Vaccinated before or after sample collection.

<sup>e</sup> Case registered before or after sample collection.

Table S4. The number of serological samples collected in Finland's different healthcare districts per year quartile.

| <b>Number of participants per healthcare district, % of the quartile's samples</b> |            |                            |              |                       |                  |                   |
|------------------------------------------------------------------------------------|------------|----------------------------|--------------|-----------------------|------------------|-------------------|
| Year                                                                               | Quartile   | Helsinki and Uusimaa (HUS) | Pirkanmaa    | Northern Ostrobothnia | Northern Savonia | Southwest Finland |
| 2020                                                                               | Q2, n=3450 | 46% (n=1603)               | 15% (n=517)  | 12% (n=420)           | 14% (n=481)      | 12% (n=429)       |
|                                                                                    | Q3, n=687  | 35% (n=242)                | 20% (n=135)  | 16% (n=107)           | 13% (n=88)       | 17% (n=115)       |
|                                                                                    | Q4, n=888  | 65% (n=580)                | 13% (n=114)  | 7% (n=63)             | 7% (n=62)        | 8% (n=69)         |
| 2021                                                                               | Q1, n=884  | 70% (n=618)                | 11% (n=101)  | 7% (n=62)             | 4% (n=37)        | 7% (n=66)         |
|                                                                                    | Q2, n=847  | 83% (n=705)                | 6% (n=50)    | 5% (n=44)             | 3% (n=22)        | 3% (n=26)         |
|                                                                                    | Q3, n=129  | 96% (n=124)                | 3% (n=4)     | 1% (n=1)              | 0% (n=0)         | 0% (n=0)          |
|                                                                                    | Q4, n=155  | 100% (n=155)               | 0% (n=0)     | 0% (n=0)              | 0% (n=0)         | 0% (n=0)          |
| 2022                                                                               | Q1, n=169  | 100% (n=169)               | 0% (n=0)     | 0% (n=0)              | 0% (n=0)         | 0% (n=0)          |
|                                                                                    | Q2, n=1335 | 48% (n=645)                | 13% (n=179)  | 11% (n=152)           | 14% (n=193)      | 12% (n=166)       |
|                                                                                    | Q3, n=60   | 33% (n=20)                 | 20% (n=12)   | 5% (n=3)              | 15% (n=9)        | 27% (n=16)        |
|                                                                                    | Q4, n=1190 | 38% (n=451)                | 16% (n=191)  | 16% (n=188)           | 17% (n=202)      | 13% (n=158)       |
| Total, n=9794                                                                      |            | 54% (n=5312)               | 13% (n=1303) | 11% (n=1040)          | 11% (n=1094)     | 11% (n=1045)      |

Table S5. N-IgG and S-IgG seropositivity by year quartile and age group.

| Year | Quartile                 | Analysed samples, n      | Age             | N-IgG positives %, (n) | S-IgG positives %, (n) |
|------|--------------------------|--------------------------|-----------------|------------------------|------------------------|
| 2020 | Q2                       | N-IgG:3450<br>S-IgG:0    | 18-29           | 0.8% (4/523)           | NA (0/0)               |
|      |                          |                          | 30-44           | 2.3% (23/1005)         | NA (0/0)               |
|      |                          |                          | 45-64           | 2.2% (35/1562)         | NA (0/0)               |
|      |                          |                          | 65-70           | 3.1% (11/360)          | NA (0/0)               |
|      | Q3                       | N-IgG:687<br>S-IgG:183   | 18-29           | 4.5% (3/66)            | 0.0% (0/10)            |
|      |                          |                          | 30-44           | 2.9% (6/204)           | 4.8% (3/62)            |
|      |                          |                          | 45-64           | 2.2% (7/317)           | 2.3% (2/88)            |
|      |                          |                          | 65-70           | 5.0% (5/100)           | 0.0% (0/23)            |
|      | Q4                       | N-IgG:888<br>S-IgG:888   | 18-29           | 6.0% (7/117)           | 3.4% (4/117)           |
|      |                          |                          | 30-44           | 2.2% (6/269)           | 0.7% (2/269)           |
|      |                          |                          | 45-64           | 2.8% (11/390)          | 1.5% (6/390)           |
|      |                          |                          | 65-70           | 0.0% (0/112)           | 0.0% (0/112)           |
| 2021 | Q1                       | N-IgG:884<br>S-IgG:884   | 18-29           | 2.7% (3/112)           | 4.5% (5/112)           |
|      |                          |                          | 30-44           | 2.4% (6/249)           | 5.2% (13/249)          |
|      |                          |                          | 45-64           | 3.6% (15/419)          | 6.9% (29/419)          |
|      |                          |                          | 65-70           | 1.9% (2/104)           | 4.8% (5/104)           |
|      | Q2                       | N-IgG:847<br>S-IgG:847   | 18-29           | 4.7% (6/127)           | 13.4% (17/127)         |
|      |                          |                          | 30-44           | 7.3% (17/232)          | 27.6% (64/232)         |
|      |                          |                          | 45-64           | 4.8% (19/399)          | 51.1% (204/399)        |
|      |                          |                          | 65-70           | 3.4% (3/89)            | 74.2% (66/89)          |
|      | Q3                       | N-IgG:129<br>S-IgG:129   | 18-29           | 0.0% (0/10)            | 70.0% (7/10)           |
|      |                          |                          | 30-44           | 6.3% (3/48)            | 77.1% (37/48)          |
|      |                          |                          | 45-64           | 3.6% (2/55)            | 90.9% (50/55)          |
|      |                          |                          | 65-70           | 0.0% (0/16)            | 93.8% (15/16)          |
| Q4   | N-IgG:155<br>S-IgG:155   | 18-29                    | 7.1% (1/14)     | 92.9% (13/14)          |                        |
|      |                          | 30-44                    | 0.0% (0/41)     | 82.9% (34/41)          |                        |
|      |                          | 45-64                    | 12.8% (10/78)   | 89.7% (70/78)          |                        |
|      |                          | 65-70                    | 4.5% (1/22)     | 100.0% (22/22)         |                        |
| 2022 | Q1                       | N-IgG:169<br>S-IgG:169   | 18-29           | 33.3% (3/9)            | 100.0% (9/9)           |
|      |                          |                          | 30-44           | 41.2% (14/34)          | 100.0% (34/34)         |
|      |                          |                          | 45-64           | 30.4% (21/69)          | 100.0% (69/69)         |
|      |                          |                          | 65-85           | 19.3% (11/57)          | 100.0% (57/57)         |
|      | Q2                       | N-IgG:1335<br>S-IgG:1335 | 18-29           | 55.4% (41/74)          | 95.9% (71/74)          |
|      |                          |                          | 30-44           | 44.9% (96/214)         | 95.3% (204/214)        |
|      |                          |                          | 45-64           | 35.6% (195/548)        | 98.2% (538/548)        |
|      |                          |                          | 65-85           | 27.9% (139/499)        | 99.6% (497/499)        |
|      | Q3                       | N-IgG:60<br>S-IgG:60     | 18-29           | 100.0% (4/4)           | 100.0% (4/4)           |
|      |                          |                          | 30-44           | 64.3% (9/14)           | 92.9% (13/14)          |
|      |                          |                          | 45-64           | 38.7% (12/31)          | 100.0% (31/31)         |
|      |                          |                          | 65-85           | 36.4% (4/11)           | 100.0% (11/11)         |
| Q4   | N-IgG:1190<br>S-IgG:1190 | 18-29                    | 71.2% (37/52)   | 98.1% (51/52)          |                        |
|      |                          | 30-44                    | 55.8% (96/172)  | 97.7% (168/172)        |                        |
|      |                          | 45-64                    | 53.6% (241/450) | 98.9% (445/450)        |                        |
|      |                          | 65-85                    | 39.7% (205/516) | 99.2% (512/516)        |                        |
